# Supplementary material for: High prevalence of vector-borne protozoans and bacteria in dogs from Chad determined using a targeted next generation sequencing approach
Source: Research Square preprint supplement (doi:10.21203/rs.3.rs-5921037/v1), 2025-04-30
Supplement: Supplementary file 1 [file 0f707d11622c9ec08fa30836.docx]

Supplementary table S1: Primary vectors, secondary or possible vectors, transmission routes, host ranges and geographical distribution of protozoan and bacterial VBPs of dogs

| Type of pathogen | Genera | VBP species | Primary vector | Secondary vector | Transmission routes | Host range | Geographical distribution | Refs |
| --- | --- | --- | --- | --- | --- | --- | --- | --- |
| Protozoans | *Babesia* | *B. vogeli* | *Rhipicephalus sanguineus* s.l. |  | Tick bites, transplacental transmission, blood transfusion | Domestic dogs and wild canids | Africa,  Europe,  Americas,  Australia | 1,2 |
|  | *B. rossi* | *Haemaphysalis elliptica* (in South Africa) | *Haemaphysalis leachi* | Tick bites, transplacental transmission and blood transfusions | Domestic dogs, wild canids, humans | South Africa  sub-Saharan Africa | 3-5 |
|  | *B. canis* | *Dermacentor reticulatus,* | *Dermacentor marginatus, Rhipicephalus sanguineus* | Tick bites, transplacental transmission, blood transfusions, dog fights | Dogs and other wild canids such as foxes and coyotes | Mostly in Europe, but worldwide | 2,5 |
|  | *B. gibsoni* | *Haemaphysalis bispinosa*  *Rhipicephalus sanguineus,* | *Haemaphysalis longicornis,*  *Haemaphysalis bispinosa,*  *Haemaphysalis hystricis,*  *Ornithodoros moubata,*  *Ixodes ricinus* | Tick bites, transplacental transmission and blood transfusions | Domestic dogs | Africa, Americas, Asia, Australia | 1,2,5 |
|  | *B. vulpes* |  | Suspected vectors  *Ixodes hexagonus*  *D. reticulatus*  *Ixodes canisuga*  *Ixodes ricinus*  *Rhipicephalus sanguineus* s.l. | Transovarial in ticks, blood transfusion, fights, and direct blood contact | Wild canids and rarely in domestic dogs | Europe, Asia, United States | 5 |
| *Leishmania* | *L. infantum* | *Phlebotomus,*  *Lutzomyia* sandflies |  | Social contact in dogs, Blood transfusions, vertical transmission | Dogs  Humans | Worldwide | 6,7 |
|  | *L. donovani* | *Phlebotomus argentipes*  sand flies |  | Bites of phlebotomine sandflies  Possible vertical transmission in humans | Dogs | India, Sudan | 8,9 |
| *Hepatozoon* | *H. canis* | *Rhipicephalus sanguineus* group |  | Horizontal  vertical | Dogs | Africa, Asia, South America, and Europe | 10-13 |
| *H. americanum* | *Amblyomma maculatum* |  | Ingestion of ticks infected with oocysts (primary), predation of infected paratenic hosts | Dogs | Unites States | 14 |
|  | *Cytauxzoon* | *C. felis* | *Amblyomma americanum* | *Dermacentor variabilis* | Tick bites  social contact, | Domestic cats, Bobcats | Unites States |  |
| Bacteria | *Rickettsia* | *R. africae* | *Amblyomma variegatum*  *Amblyomma hebraeum* | *Amblyomma loculosum* (in Oceania) | Transovarial and transstadial | Dogs, cattle, and humans (accidental hosts) | sub-Saharan Africa. Oceania | 15,16 |
| *R. massiliae* | *Rhipicephalus sanguineus* s.l. | *Rhipicephalus turanicus* | Tick bites, Transovarial and transstadial transmission in  *R. turanicus* | Dogs, humans | Worldwide | 17 |
| *R. rickettsii* | *Dermacentor variabilis,*  *Dermacentor andersoni,*  *Amblyomma aureolatum, Amblyomma sculptum.* | *Rhipicephalus sanguineus, Amblyomma imitator, Amblyomma americanum* | Transovarial and horizontal transmission in ticks during co-feeding | Dogs, humans (accidental hosts) | Americas | 16,18 |
| *R. aeschlimannii* | *Hyalomma marginatum* | *Rhipicephalus turanicus*  *Haemaphysalis* spp. | Transovarial | Dogs | sub-Saharan Africa, Asia, and Europe | 19 |
| *R. rhipicephali* | *Rhipicephalus sanguineus* group |  | Transovarial | Dogs | Americas | 16 |
| *R. conorii* | *Rhipicephalus* sanguineus s.l. | *Rhipicephalus simus, Haemaphysalis* spp.  *Rhipicephalus muhsamae*  *Hyalomma kumari* | Tick bites, transovarial transmission in ticks, co-feeding transmission in ticks | Dogs, humans (accidental hosts) | Parts of Europe, Africa, and Asia | 2 |
| *R. felis* | Fleas *Ctenocephalides felis, Ctenocephalides canis* | *Rhipicephalus sanguineus*  *Culex pipiens pallens* | Vertical transmission (transovarial),  horizontal transmission, possibly through flea feces | Dogs, humans, cats, possibly humans | Africa, Europe, the Americas, Asia, Australia | 20,21 |
|  | *R. asembonensis* | *Ctenocephalides felis* | Mosquitoes (suspected) | Vertical transmission in fleas | Dogs, cats | Americas, Asia, Africa | 20 |
| *Borrelia* | *B. burgdorferi* | *Ixodes scapularis,*  *Ixodes pacificus*  *Ixodes muris* |  |  | Dogs, humans, White footed mice | United States | 22 |
|  | *B. afzelii* | *Ixodes ricinus,*  *Ixodes hexagonus Ixodes persulcatus* |  | Tick bites to hosts, co-feeding transmission in ticks | Rodents, humans, and domestic dogs as incidental hosts | Europe, Asia | 22 |
|  | *B. garinii* | *Ixodes persulcatus (Eurasia)*  *Ixodes ricinus (Europe)* |  | Tick bites (primary),  transstadial transmission | Birds, small mammals, and mice. Dogs and humans are incidental hosts | Europe | 22 |
| Hemotrophic Mycoplasmas | *C.* M. haematoparvum | Ticks and fleas *Rhipicephalus sanguineus* (suspected) *Ctenocephalides felis* (suspected),  *Pulex irritans* |  | Not fully understood, but vertical transmission in dogs, blood transfusion, aggressive interactions, and  arthropod bites are suspected. | Dogs, potentially in humans | Worldwide | 23,24 |
|  | *M. haemocanis* | *Ticks and fleas Rhipicephalus sanguineus* (suspected), *Ctenocephalides felis* (suspected)*,*  *Pulex irritans* |  | Not fully understood, but vertical transmission in cats, ticks, and flea bites, aggressive interactions & social contact, and blood transfusion are suspected | Dogs | Worldwide | 23,24 |
|  | *C.* M. turicensis | *Ctenocephalides felis* | *Ixodes* spp.  *Rhipicephalus* spp. | Not fully understood but aggressive interactions, blood transfusion, and social grooming,  tick and flea bites | Domestic cats, wild felids | Worldwide | 25 |
|  | *M. haemofelis* | *Fleas* |  | Tick and flea bites (primary), vertical transmission, aggressive interactions, and social contact | Cats, wild felids | Worldwide | 26 |
|  | *C.* M. haemominutum | *Ctenocephalides felis* |  | Not fully understood, but flea bites (primary), vertical transmission, aggressive interactions, and social contact are suspected interactions | Cats, wild felids |  | 26 |
| *Anaplasma* | *A. platys* | *Rhipicephalus sanguineus* s.l.  *Rhipicephalus sanguineus* s.s. | *Rhipicephalus camicasi* (suspected) | Transovarial and horizontal transmission, transstadial maintenance | Dogs, cats, red deer, and humans | Worldwide | 27 |
|  | *A. phagocytophilum* | *Ixodes scapularis,*  *Ixodes pacificus,*  *Ixodes ricinus,*  *Ixodes persulcatus* |  | Horizontal transmission,  Transstadial transmission in ticks | Deer, rodents, bison, sheep, humans, and dogs are accidental hosts | Europe,  North America | 2 |
| *Ehrlichia* | *E. canis* | *Rhipicephalus sanguineus* | *Haemaphysalis longicornis* (in east Asia) | Transstadial | Dogs, other canids, and humans |  | 28,29 |
| *E. ewingii* | *Amblyomma americanum* |  | Blood transfusion | Dogs, white tailed deer, humans, goats | United States in areas where *A. americanum* is expanding its range | 18 |
| *E. chaffeensis* | *Amblyomma americanum,*  *Dermacentor variabilis* |  |  | White tailed deer, Humans, Domestic dogs, raccoons, and coyotes | Southern United States, Mid-west and along the eastern seaboard, New England, Europe, Africa | 2 |
|  | *E. muris* | *Ixodes scapularis, Ixodes persulcatus* | *Ixodes cookei* |  | Dogs, Mice, White footed mice, and humans as accidental hosts | Japan, United States (*E. muris* subsp. *eauclairensis*), and Europe | 30 |
| *Bartonella* | *B. henselae* | *Ctenocephalides felis* | *Ixodes ricinus, Rhipicephalus sanguineus* |  | Dogs, coyotes, cats, and humans as accidental hosts | Worldwide | 21,31 |
|  | *B. vinsonii berkhoffii* | *Rhipicephalus sanguineus,*  *Pulex* spp. |  | Tick bites, Mechanical transmission such as during fighting and scratching | Dogs and other wild canids, cats, and humans (accidental hosts) | Worldwide | 32 |
| *Yersinia* | *Y. pestis* | Oriental rat flea *(Xenopsylla cheopis)* | Other flea species have been implicated, including *Pulex irritans, Ctenocephalides felis* and *Oropsylla montana* |  | Dogs, cats, rats, prairie dogs, and occasionally other large mammals | Africa, The Americas, Asia | 33 |
|  | *Francisella* | *F. tularensis* | *Dermacentor variabilis,*  Deer flies *(Chrysops discalis), Aedes sticticus, Aedes vexans, and Aedes punctor* | *Dermacentor andersoni,*  *Dermacentor occidentalis,*  *Dermacentor reticulatus,*  *Ixodes ricinus,*  *Amblyomma americanum*,  Horse flies | Direct contact, Transstadial transmission in mosquitoes, aerosolized bacteria, ingestion of contaminated food or water | Rodents, lagomorphs, dogs, and humans (accidental hosts) | North America,  Europe | 34,35 |

1 Bitam, I. Vectors of *Rickettsiae* in Africa. *Ticks Tick Borne Dis.* **3**, 382-386 (2012).

2 Shaw, S. E., Day, M. J., Birtles, R. J. & Breitschwerdt, E. B. Tick-borne infectious diseases of dogs. *Trends Parasitol.* **17**, 74-80 (2001). <https://doi.org/10.1016/s1471-4922(00)01856-0>

3 Kamani, J. Molecular evidence indicts *Haemaphysalis leachi* (Acari: Ixodidae) as the vector of *Babesia rossi* in dogs in Nigeria, West Africa. *Ticks Tick Borne Dis.* **12**, 101717 (2021). <https://doi.org/10.1016/j.ttbdis.2021.101717>

4 Jongejan, F. & Uilenberg, G. The global importance of ticks. *Parasitology.* **129**, S3-S14 (2004). <https://doi.org/10.1017/s0031182004005967>

5 Nehra, A. K., Kumari, A., Moudgil, A. D. & Vohra, S. in *Organ-Specific Parasitic Diseases of Dogs and Cats* (ed Tanmoy Rana) 53-88 (AP., 2023).

6 Morales-Yuste, M., Martín-Sánchez, J. & Corpas-Lopez, V. Canine Leishmaniasis: Update on Epidemiology, Diagnosis, Treatment, and Prevention. *Vet Sci.* **9** (2022). <https://doi.org/10.3390/vetsci9080387>

7 Petersen, C. A. & Barr, S. C. Canine Leishmaniasis in North America: Emerging or Newly Recognized? *Vet. Clin. North Am. Small Anim. Pract.* **39**, 1065-1074 (2009). <https://doi.org/10.1016/j.cvsm.2009.06.008>

8 Kushwaha, A. K. *et al.* Dogs as Reservoirs for *Leishmania donovani,* Bihar, India, 2018–2022. *Emerging Infect. Dis.* **30**, 2604 (2024). <https://doi.org/10.3201/eid3012.240649>

9 Avila-García, M. *et al.* Transplacental transmission of cutaneous *Leishmania mexicana* strain in BALB/c mice. *Am J Trop Med Hyg.* **89**, 354-358 (2013). <https://doi.org/10.4269/ajtmh.12-0716>

10 Aikaterini Alexandra, D., Angela Monica, I., Keshav, J., Călin Mircea, G. & Andrei Daniel, M. Molecular confirmation of *Hepatozoon canis* in Mauritius. *Acta Trop.* **177**, 116-117 (2018). <https://doi.org/https://doi.org/10.1016/j.actatropica.2017.10.005>

11 Baneth, G. Perspectives on canine and feline hepatozoonosis. *Vet. Parasitol.* **181**, 3-11 (2011). <https://doi.org/https://doi.org/10.1016/j.vetpar.2011.04.015>

12 Ramos, R. A. N. *et al.* Occurrence of *Hepatozoon canis* and *Cercopithifilaria bainae* in an off-host population of *Rhipicephalus sanguineus* sensu lato ticks. *Ticks Tick Borne Dis.* **5**, 311-314 (2014). <https://doi.org/https://doi.org/10.1016/j.ttbdis.2013.12.005>

13 Tołkacz, K. *et al.* The first report on *Hepatozoon canis* in dogs and wolves in Poland: clinical and epidemiological features. *Parasit. Vectors.* **16**, 313 (2023). <https://doi.org/10.1186/s13071-023-05928-5>

14 Johnson, E. *et al.* Alternate pathway of infection with *Hepatozoon americanum* and the epidemiologic importance of predation. *J. Vet. Intern. Med.* **23**, 1315-1318 (2009). <https://doi.org/10.1111/j.1939-1676.2009.0375.x>

15 Osip, S. *et al.* Prevalence and diversity of spotted fever group *Rickettsia* species in ixodid ticks from domestic dogs in Chad, Africa. *Ticks Tick Borne Dis.* **15**, 102405 (2024). <https://doi.org/https://doi.org/10.1016/j.ttbdis.2024.102405>

16 Macaluso, K., Paddock, C. D., Sonenshine, D. & Roe, R. *Tick-borne spotted fever group rickettsioses and Rickettsia species*. Vol. 2 (2014).

17 Ereqat, S. *et al.* Molecular Detection and Identification of Spotted Fever Group *Rickettsiae* in Ticks Collected from the West Bank, Palestinian Territories. *PLoS Negl Trop Dis.* **10**, e0004348 (2016). <https://doi.org/10.1371/journal.pntd.0004348>

18 Magnarelli, L. A. Global Importance of Ticks and Associated Infectious Disease Agents. *Clin. Microbiol. Newsl.* **31**, 33-37 (2009). <https://doi.org/https://doi.org/10.1016/j.clinmicnews.2009.02.001>

19 Wei, Q.-Q. *et al.* The first detection of *Rickettsia aeschlimannii* and *Rickettsia massiliae* in *Rhipicephalus turanicus* ticks, in northwest China. *Parasit. Vectors.* **8**, 631 (2015). <https://doi.org/10.1186/s13071-015-1242-2>

20 Moonga, L. C. *et al.* Molecular detection of *Rickettsia felis* in dogs, rodents and cat fleas in Zambia. *Parasit. Vectors.* **12**, 168 (2019). <https://doi.org/10.1186/s13071-019-3435-6>

21 Huang, H. H. H. *et al.* Cat fleas (*Ctenocephalides felis* clade 'Sydney') are dominant fleas on dogs and cats in New South Wales, Australia: Presence of flea-borne *Rickettsia felis, Bartonella* spp. but absence of *Coxiella burnetii* DNA. *Curr Res Parasitol Vector Borne Dis.* **1**, 100045 (2021). <https://doi.org/10.1016/j.crpvbd.2021.100045>

22 Littman, M. P. *et al.* ACVIM consensus update on Lyme borreliosis in dogs and cats. *J Vet Intern Med.* **32**, 887-903 (2018). <https://doi.org/10.1111/jvim.15085>

23 Beus, K., Goudarztalejerdi, A. & Sazmand, A. Molecular detection and identification of hemotropic Mycoplasma species in dogs and their ectoparasites in Iran. *Sci Rep.* **14**, 580 (2024). <https://doi.org/10.1038/s41598-024-51173-w>

24 Huggins, L. G. *et al.* Transmission of haemotropic *Mycoplasma* in the absence of arthropod vectors within a closed population of dogs on ectoparasiticides. *Sci. Rep.* **13**, 10143 (2023). <https://doi.org/10.1038/s41598-023-37079-z>

25 Novacco, M. *et al.* Chronic "*Candidatus* Mycoplasma turicensis" infection. *Vet. Res.* **42**, 59 (2011). <https://doi.org/10.1186/1297-9716-42-59>

26 Woods, J. E., Brewer, M. M., Hawley, J. R., Wisnewski, N. & Lappin, M. R. Evaluation of experimental transmission of *Candidatus* Mycoplasma haemominutum and *Mycoplasma haemofelis* by *Ctenocephalides felis* to cats. *Am. J. Vet. Res.* **66**, 1008-1012 (2005). <https://doi.org/10.2460/ajvr.2005.66.1008>

27 Snellgrove, A. N. *et al.* Vector competence of *Rhipicephalus sanguineus* sensu stricto for *Anaplasma platys*. *Ticks Tick Borne Dis.* **11**, 101517 (2020). <https://doi.org/10.1016/j.ttbdis.2020.101517>

28 Poolsawat, N. *et al.* Molecular occurrence and genetic diversity of *Ehrlichia* *canis* in naturally infected dogs from Thailand. *Sci. Rep.* **13**, 20394 (2023). <https://doi.org/10.1038/s41598-023-47784-4>

29 Aziz, M. U. *et al.* Ehrlichiosis in Dogs: A Comprehensive Review about the Pathogen and Its Vectors with Emphasis on South and East Asian Countries. *Vet Sci.* **10** (2022). <https://doi.org/10.3390/vetsci10010021>

30 Hegarty, B. *et al.* *Ehrlichia muris* infection in a dog from Minnesota. *J. Vet. Intern. Med.* **26**, 1217-1220 (2012).

31 Wechtaisong, W., Bonnet, S. I., Lien, Y. Y., Chuang, S. T. & Tsai, Y. L. Transmission of *Bartonella henselae* within *Rhipicephalus sanguineus*: Data on the Potential Vector Role of the Tick. *PLoS Negl Trop Dis.* **14**, e0008664 (2020). <https://doi.org/10.1371/journal.pntd.0008664>

32 Álvarez-Fernández, A., Breitschwerdt, E. B. & Solano-Gallego, L. *Bartonella* infections in cats and dogs including zoonotic aspects. *Parasit. Vectors.* **11**, 624 (2018). <https://doi.org/10.1186/s13071-018-3152-6>

33 Demeure, C. E. *et al.* *Yersinia pestis* and plague: an updated view on evolution, virulence determinants, immune subversion, vaccination, and diagnostics. *Genes Immun.* **20**, 357-370 (2019). <https://doi.org/10.1038/s41435-019-0065-0>

34 Zellner, B. & Huntley, J. F. Ticks and Tularemia: Do We Know What We Don't Know? *Front. Cell. Infect. Microbiol.* **9** (2019). <https://doi.org/10.3389/fcimb.2019.00146>

35 Kittl, S. *et al.* First European report of *Francisella tularensis* subsp. *holarctica* isolation from a domestic cat. *Vet. Res.* **51**, 1-5 (2020).
